# Supplementary material for: Polymorphism of CsGaS2– structural characterization of a new two-dimensional polymorph and study of the phase-transition kinetics
Source: Royal Society of Chemistry journal article supplement (doi:10.1039/c6qi00462h), 2016-12-28
Supplement: c6qi00462h1.pdf [file c6qi00462h1.pdf]

Supplementary Information for the manuscript

**Polymorphism of CsGaS<sub>2</sub> – Structural Characterization of a new two-dimensional Polymorph and Study of the Phase-Transition Kinetics**

*Daniel Friedrich, Marc Schlosser, Richard Wehrich and Arno Pfitzner\**

\*Prof. Dr. Arno Pfitzner

Institut für Anorganische Chemie, Universität Regensburg, Universitätsstraße 31, 93040

Regensburg, Germany

## **List of contents**

**Table S1** Anisotropic displacement parameters for CsGaS<sub>2</sub>-*mC64*.

**Table S2** Selected interatomic distances for CsGaS<sub>2</sub>-*mC64*.

**Table S3** Anisotropic displacement parameters for CsGaS<sub>2</sub>-*mC16*.

**Table S4** Selected interatomic distances CsGaS<sub>2</sub>-*mC16*.

**Figure S1** Differential thermal analysis of CsGaS<sub>2</sub>-*mC16*.

**Figure S2** Electronic band structure of CsGaS<sub>2</sub>-*mC64*.

**Figure S3** Electronic band structure of CsGaS<sub>2</sub>-*mC16*.

**Table S1** Anisotropic displacement parameters  $U_{ij}$  (in  $\text{\AA}^2$ ) for CsGaS<sub>2</sub>-mC64.

| Atom | $U_{11}$  | $U_{22}$  | $U_{33}$  | $U_{12}$   | $U_{13}$   | $U_{23}$   |
|------|-----------|-----------|-----------|------------|------------|------------|
| Cs1  | 0.0206(2) | 0.0222(2) | 0.0166(2) | -0.0050(1) | 0.0027(1)  | -0.0002(1) |
| Cs2  | 0.0201(2) | 0.0213(2) | 0.0177(2) | 0.0049(1)  | 0.0033(1)  | -0.0003(1) |
| Ga1  | 0.0111(2) | 0.0120(3) | 0.0105(2) | 0.0014(2)  | 0.0025(2)  | -0.0004(2) |
| Ga2  | 0.0107(2) | 0.0121(3) | 0.0106(2) | -0.0011(2) | 0.0017(2)  | -0.0004(2) |
| S1   | 0.0138(5) | 0.0148(7) | 0.0100(5) | -0.0056(4) | 0.0019(4)  | 0.0000(5)  |
| S2   | 0.0126(5) | 0.0125(7) | 0.0104(5) | 0.0062(4)  | 0.0022(4)  | -0.0001(5) |
| S3   | 0.0098(5) | 0.0130(8) | 0.0146(6) | -0.0004(4) | 0.0027(4)  | -0.0023(4) |
| S4   | 0.0141(7) | 0.0126(1) | 0.0129(7) | 0          | 0.0049(6)  | 0          |
| S5   | 0.0129(7) | 0.0126(1) | 0.0134(7) | 0          | -0.0001(6) | 0          |

**Table S2** Selected interatomic distances / $\text{\AA}$  and angles / $^\circ$  for CsGaS<sub>2</sub>-mC64.

| Bond length / $\text{\AA}$ |          | Angle / $^\circ$       |          |                            |           |
|----------------------------|----------|------------------------|----------|----------------------------|-----------|
| Ga1-S1 <sup>vii</sup>      | 2.300(1) | Cs1-S1                 | 3.749(1) | S1 <sup>vii</sup> -Ga1-S2  | 108.24(4) |
| Ga1-S2                     | 2.304(1) | Cs1-S1 <sup>viii</sup> | 3.743(1) | S1 <sup>vii</sup> -Ga1-S3  | 110.25(5) |
| Ga1-S3                     | 2.260(1) | Cs1-S1 <sup>ii</sup>   | 3.488(1) | S1 <sup>vii</sup> -Ga1-S4  | 110.22(4) |
| Ga1-S4                     | 2.260(1) | Cs1-S2 <sup>v</sup>    | 3.535(1) | S2-Ga1-S3                  | 107.28(4) |
| Ga2-S1                     | 2.304(1) | Cs1-S3                 | 3.552(1) | S2-Ga1-S4                  | 107.30(5) |
| Ga2-S2 <sup>xiii</sup>     | 2.308(1) | Cs1-S3 <sup>iv</sup>   | 3.555(1) | S3-Ga1-S4                  | 113.34(4) |
| Ga2-S3                     | 2.261(1) | Cs1-S4                 | 3.552(1) | S1-Ga2-S2 <sup>xiii</sup>  | 108.62(4) |
| Ga2-S5                     | 2.260(1) | Cs1-S5 <sup>viii</sup> | 3.556(1) | S1-Ga2-S3                  | 110.16(5) |
|                            |          | Cs2-S1 <sup>xii</sup>  | 3.512(1) | S1-Ga2-S5                  | 110.15(4) |
| Cs1-Cs1 <sup>i</sup>       | 5.256(1) | Cs2-S2                 | 3.741(1) | S2 <sup>xiii</sup> -Ga2-S3 | 107.17(4) |
| Cs1-Cs1 <sup>ii</sup>      | 5.257(1) | Cs2-S2 <sup>xi</sup>   | 3.747(1) | S2 <sup>xiii</sup> -Ga2-S5 | 107.20(5) |
| Cs1-Cs2 <sup>iii</sup>     | 3.746(1) | Cs2-S2 <sup>x</sup>    | 3.566(1) | S3-Ga2-S5                  | 113.35(4) |
| Cs1-Cs2 <sup>iv</sup>      | 3.730(1) | Cs2-S3                 | 3.508(1) |                            |           |
| Cs1-Cs2 <sup>v</sup>       | 5.273(1) | Cs2-S3 <sup>iii</sup>  | 3.508(1) |                            |           |
| Cs1-Cs2 <sup>vi</sup>      | 5.275(1) | Cs2-S4 <sup>xi</sup>   | 3.506(1) |                            |           |
| Cs2-Cs2 <sup>iii</sup>     | 4.676(1) | Cs2-S5 <sup>viii</sup> | 3.511(1) |                            |           |
| Cs2-Cs2 <sup>ix</sup>      | 5.297(1) |                        |          |                            |           |
| Cs2-Cs2 <sup>x</sup>       | 5.295(1) |                        |          |                            |           |

<sup>a</sup> Symmetry codes used to generate equivalent atoms: (i)  $-x+1, -y, -z+1$ ; (ii)  $-x+0.5, -y+0.5, -z+1$ ; (iii)  $-x+1, y, -z+0.5$ ; (iv)  $-x+0.5, y-0.5, -z+0.5$ ; (v)  $x, -y, z+0.5$ ; (vi)  $x-0.5, -y+0.5, z+0.5$ ; (vii)  $-x, y, -z+0.5$ ; (viii)  $x+0.5, y-0.5, z$ ; (ix)  $-x+1, -y+1, -z$ ; (x)  $-x+0.5, -y+0.5, -z$ ; (xi)  $x+0.5, y+0.5, z$ ; (xiii)  $-x+0.5, y+0.5, -z+0.5$ .

**Table S3** Anisotropic displacement parameters  $U_{ij}$  (in  $\text{\AA}^2$ ) for CsGaS<sub>2</sub>-mC16.

| Atom | $U_{11}$  | $U_{22}$  | $U_{33}$  | $U_{12}$  | $U_{13}$  | $U_{23}$  |
|------|-----------|-----------|-----------|-----------|-----------|-----------|
| Cs   | 0.0144(1) | 0.0128(1) | 0.0152(1) | 0         | 0.0057(1) | 0         |
| Ga   | 0.0097(1) | 0.0111(1) | 0.0067(1) | 0         | 0.0042(1) | 0         |
| S    | 0.0128(2) | 0.0129(2) | 0.0095(2) | 0.0032(1) | 0.0055(1) | 0.0016(1) |

**Table S4** Selected interatomic distances / $\text{\AA}$  and angles / $^\circ$  for CsGaS<sub>2</sub>-mC16.

| Bond length / $\text{\AA}$ |           |                      | Angle / $^\circ$ |                                       |           |
|----------------------------|-----------|----------------------|------------------|---------------------------------------|-----------|
| Ga-S                       | 2.2869(5) | Cs-S                 | 3.6200(5)        | S-Ga-S <sup>vii</sup>                 | 112.44(2) |
| Ga-S <sup>xii</sup>        | 2.2823(4) | Cs-S <sup>v</sup>    | 3.6813(5)        | S-Ga-S <sup>xii</sup>                 | 99.54(2)  |
|                            |           | Cs-S <sup>vii</sup>  | 3.6200(5)        | S-Ga-S <sup>xiv</sup>                 | 114.30(2) |
| Ga-Ga <sup>xii</sup>       | 2.9510(2) | Cs-S <sup>viii</sup> | 3.6813(5)        | S <sup>vii</sup> -Ga-S <sup>xii</sup> | 114.30(2) |
|                            |           | Cs-S <sup>ix</sup>   | 3.7025(5)        | S <sup>vii</sup> -Ga-S <sup>xiv</sup> | 99.54(2)  |
| Cs-Cs <sup>i</sup>         | 4.5850(3) | Cs-S <sup>iv</sup>   | 3.6812(5)        | S <sup>xii</sup> -Ga-S <sup>xiv</sup> | 117.44(2) |
| Cs-Cs <sup>iii</sup>       | 4.5032(3) | Cs-S <sup>x</sup>    | 3.6812(5)        |                                       |           |
|                            |           | Cs-S <sup>xi</sup>   | 3.7025(5)        |                                       |           |

<sup>a</sup> Symmetry codes used to generate equivalent atoms: (i) -x,-y,-z; (iii) -x-0.5,-y+0.5,-z; (iv) -x+0.5,-y+0.5,-z+1; (v) x-0.5,y-0.5,z; (vii) -x,y,-z+0.5; (viii) -x+0.5,y-0.5,-z+0.5; (ix) -x+0.5,-y+0.5,-z; (x) x-0.5,-y+0.5,z-0.5; (xi) x-0.5,-y+0.5,z+0.5; (xii) -x,-y+1,-z; (xiv) x,-y+1,z+0.5.

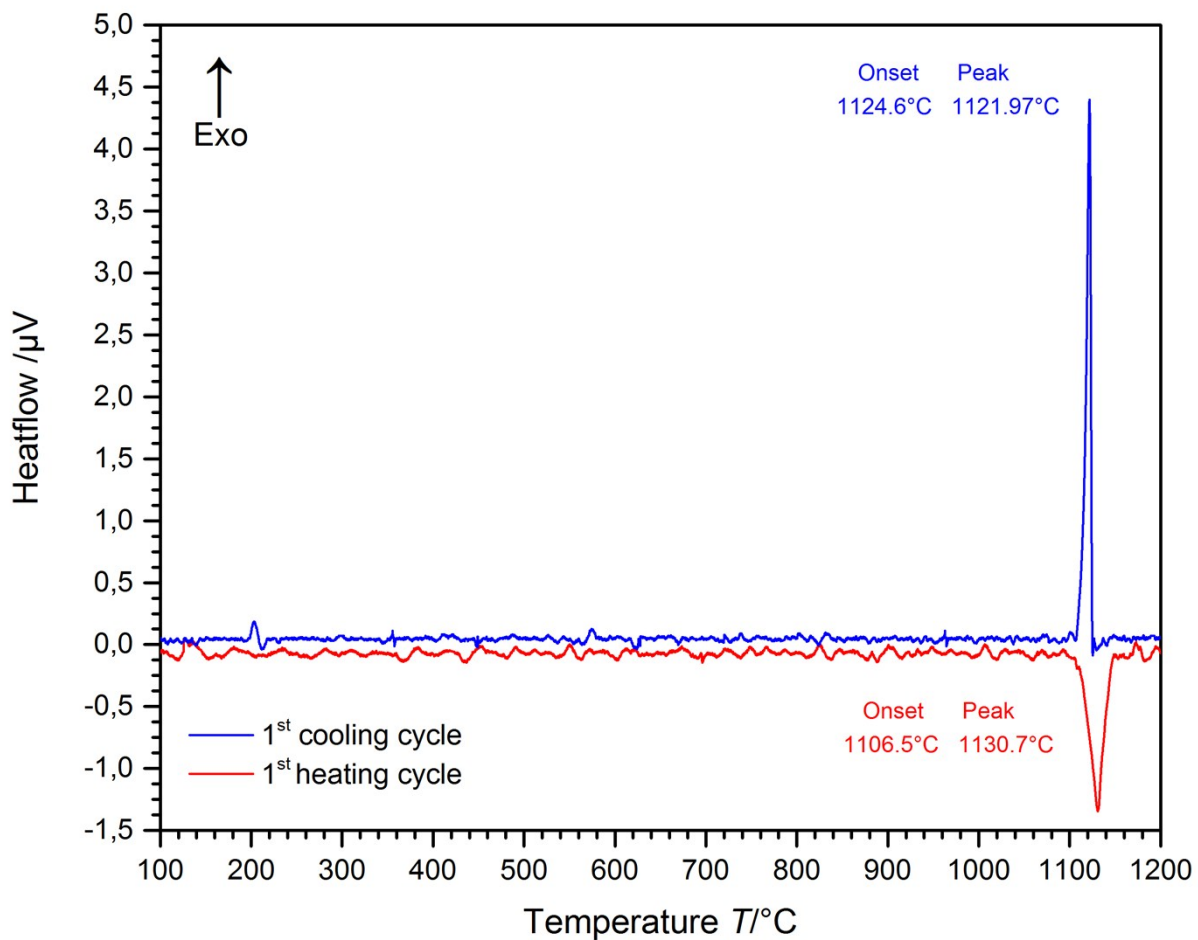

**Figure S1** Differential thermal analysis (DTA) of  $\text{CsGaS}_2\text{-}m\text{C16}$  (the baseline was manually subtracted). Heating rate is 10 K/min.

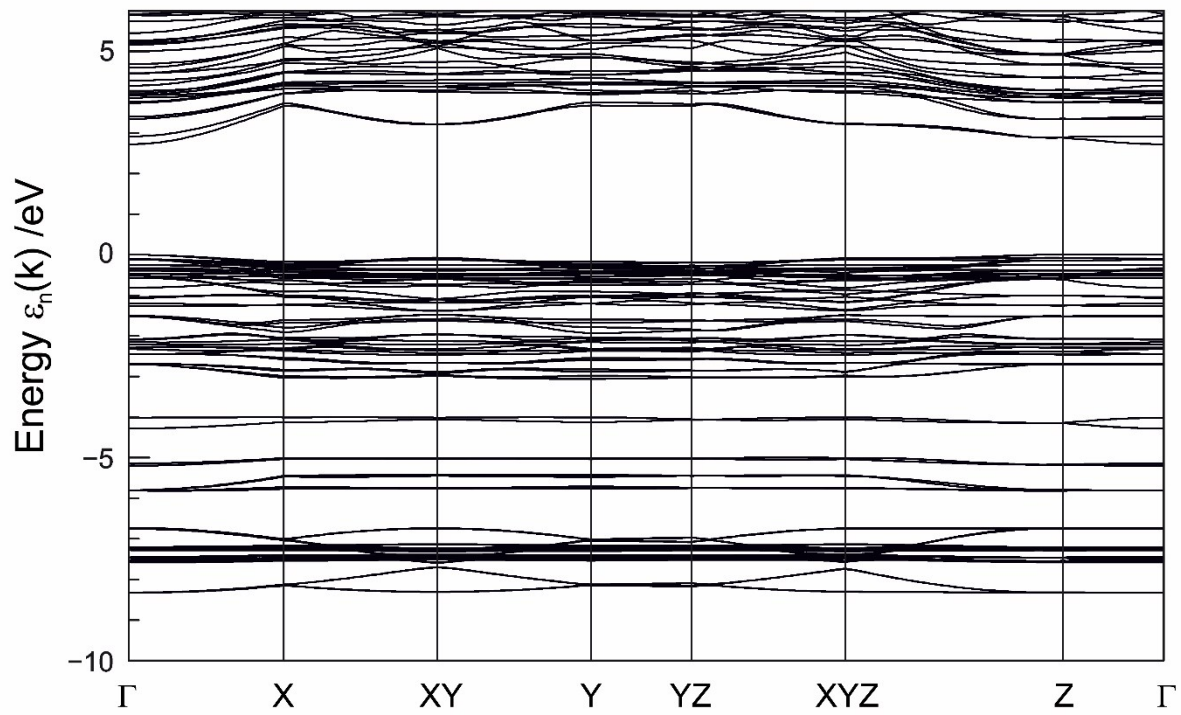

**Figure S2** Electronic band structure of CsGaS<sub>2</sub>-mC64.

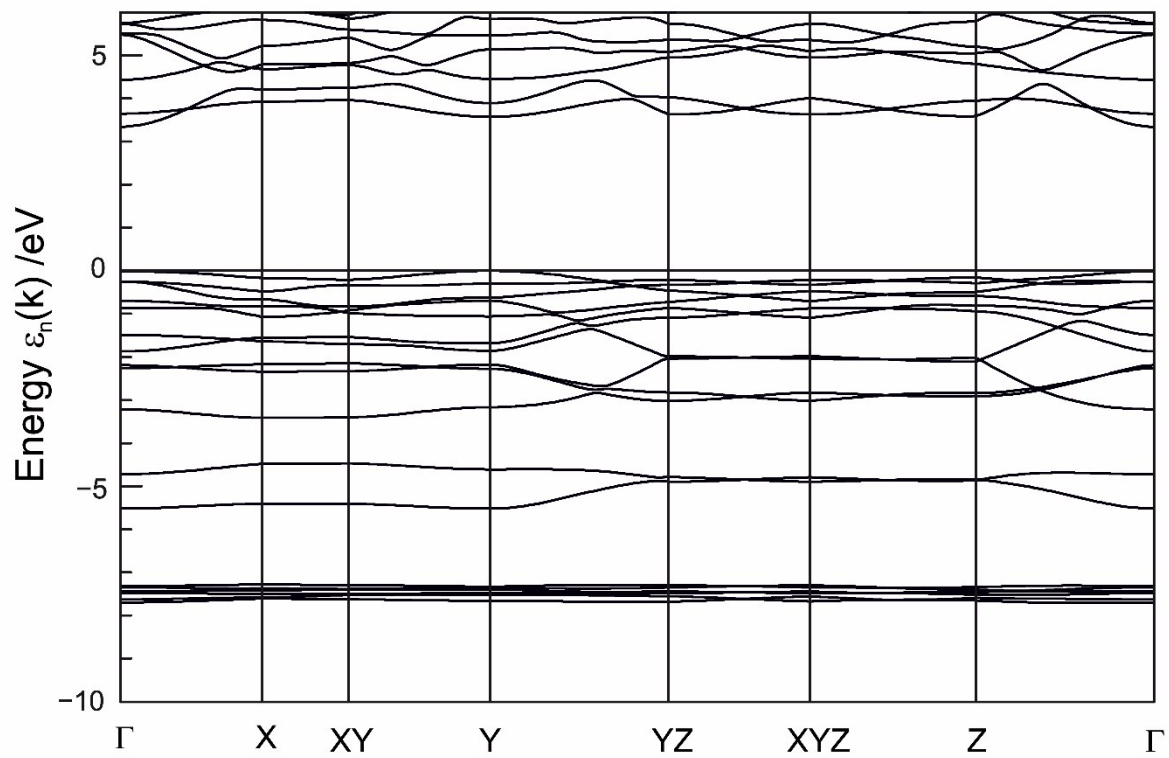

**Figure S3** Electronic band structure of CsGaS<sub>2</sub>-mC16.
